# Supplementary material for: Absence of Dpy19l2, a new inner nuclear membrane protein, causes globozoospermia in mice by preventing the anchoring of the acrosome to the nucleus
Source: Oxford University Press journal article supplement (doi:10.1242/dev.077982), 2012-07-05
Supplement: dev077982-tables1.pdf [file dev077982-tables1.pdf]

**Table S1. Mouse models of associated anomalies of the acrosome morphogenesis and nuclear shaping in spermatids**

| KO mouse for                | Corresponding protein                                                                   | Function                                                 | Localization                                       | Acrosome                             | Nuclear shape                          | Nuclear membrane and lamina                                       | Reference(s)                                          |
|-----------------------------|-----------------------------------------------------------------------------------------|----------------------------------------------------------|----------------------------------------------------|--------------------------------------|----------------------------------------|-------------------------------------------------------------------|-------------------------------------------------------|
| <i>Pick1</i> *              | Protein interacting with C kinase 1                                                     | Golgi vesicle fusion; Protein trafficking                | Trans-Golgi Gopc partner<br>Ck2 $\alpha$ ' partner | Fragmented                           | Poorly elongated, not hook shape       | Normal                                                            | (Xiao et al., 2009)                                   |
| <i>Gopc</i>                 | Golgi-associated PDZ- and coiled-coil motif-containing protein                          | Golgi vesicle fusion; Vesicle trafficking                | Trans-Golgi Pick1 partner                          | Fragmented                           | Round or ovoid not hook shape          | Normal                                                            | (Ito et al., 2004; Yao et al., 2002)                  |
| <i>Vps54</i> <sup>‡</sup>   | Vacuolar-vesicular protein sorting 54 homolog                                           | Vesicular sorting protein Retrograde traffic             | Acrosome                                           | Absent Failure of vesicle fusion     | Poorly elongated and irregular outline | Normal                                                            | (Paiardi et al., 2011)                                |
| <i>Hrb Agfg1</i> (official) | HIV-1 Rev binding protein ArfGAP with FG repeats 1 (official symbol)                    | Golgi vesicle fusion                                     | Cytoplasmic surface of acrosome                    | Absent Failure of vesicle fusion     | Globular                               | Apparently normal                                                 | (Kang-Decker et al., 2001; Kierszenbaum et al., 2004) |
| <i>Zpbp1</i>                | Zona pellucida binding protein 1                                                        | Binding and penetration into the zona pellucida          | Acrosomal matrix                                   | Bulged                               | Shortened hook                         | Normal                                                            | (Yatsenko et al., 2011)                               |
| <i>Csnk2a2</i>              | Casein kinase II alpha' catalytic subunit                                               | Kinase/ phosphorylation                                  | Ubiquitous Acrosomal matrix Pick1 partner          | Partially separated from the nucleus | Poorly elongated                       | Swelling of nuclear membranes                                     | (Mannowetz et al., 2010; Xu et al., 1999)             |
| <i>Hsp90b1</i>              | Heat shock protein 90b1 heat shock protein 90, beta (Grp94), member 1 (official symbol) | Endoplasmic chaperone                                    | Endoplasmic reticulum                              | Partially present                    | Globular or deformed                   | ?                                                                 | (Audouard and Christians, 2011)                       |
| <i>Gba2</i>                 | Glucosidase beta 2                                                                      | Hydrolyzes glucosylceramide                              | Endoplasmic reticulum and/or plasma membrane       | Partially present, disordered        | Not elongated and irregular outline    | ?                                                                 | (Walden et al., 2007; Yildiz et al., 2006)            |
| <i>Dpy19l2</i>              | Dpy-19-like 2 (C. elegans)                                                              | Linker of Nucleoskeleton and Cytoskeleton (LINC) partner | Inner Nuclear membrane                             | Absent                               | Round                                  | Destabilization of nuclear lamina. Nuclear membrane splitting off | This work                                             |

\*Spinocerebellar ataxia (neurodegeneration)

<sup>‡</sup>Wobbler mice with spinal muscular atrophy (motoneurons degeneration)
